# Supplementary material
Source: Springer Nature journal article supplement (https://www.springermedizin.de/resource/supplementary/12958_2009_711_MOESM5_ESM.pdf/9568658)

# Oral tocopherol supplementation

Pre-supplementation

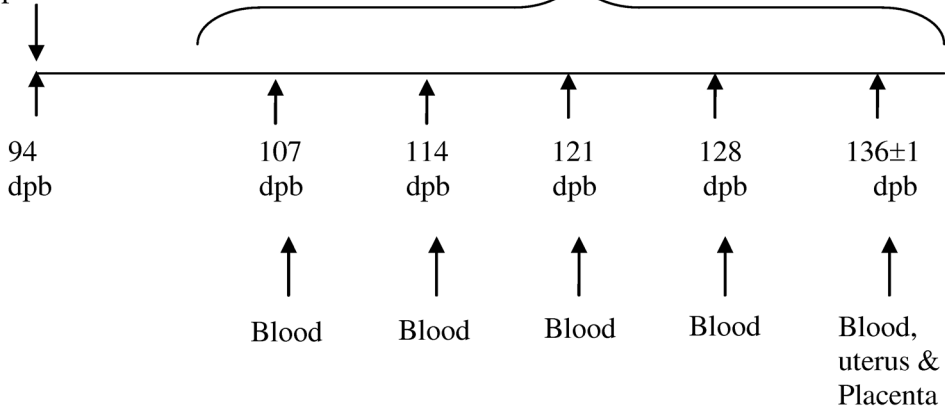

Supplement: MOESM5 [file 9568658]
